# Supplementary material for: Neuropsychological Characterization of Aggressive Behavior in Children and Adolescents with CD/ODD and Effects of Single Doses of Medications: The Protocol of the Matrics_WP6-1 Study
Source: MDPI journal article supplement (doi:10.3390/brainsci11121639), 2021-12-11
Supplement: s1 [file s1]

## Supplementary materials

**Table S1.** Matrics WP6-1 study schedule of events

|                                                            | Screening | Baseline <sup>a</sup><br>(case & control) |    | Single-blind, placebo controlled,<br>acute dose, cross-over, randomised<br>medication challenge <sup>b</sup> |                |                |
|------------------------------------------------------------|-----------|-------------------------------------------|----|--------------------------------------------------------------------------------------------------------------|----------------|----------------|
| Visit                                                      | -1        | 0a                                        | 0b | 1                                                                                                            | 2              | 3              |
| Week                                                       | -4 to -1  | 0                                         |    | 1                                                                                                            | 2              | 3              |
| Informed Consent / Assent                                  | ✓         | ✓                                         |    |                                                                                                              |                |                |
| Inclusion / Exclusion Criteria                             | ✓         | ✓                                         |    |                                                                                                              |                |                |
| Socio-demographics                                         | ✓         |                                           |    |                                                                                                              |                |                |
| Family medical history                                     | ✓         |                                           |    |                                                                                                              |                |                |
| Medical and psychiatric history                            | ✓         | ✓                                         |    |                                                                                                              |                |                |
| Medication History                                         | ✓         |                                           |    |                                                                                                              |                |                |
| Current medications & Confirm washout/prohibited medicines | ✓         | ✓                                         |    | ✓                                                                                                            | ✓              | ✓              |
| Physical Examination                                       | ✓         |                                           |    | ✓                                                                                                            | ✓              | ✓              |
| Height                                                     | ✓         | ✓                                         |    |                                                                                                              |                |                |
| Weight                                                     | ✓         | ✓                                         |    | ✓                                                                                                            | ✓              | ✓              |
| Body Temperature                                           | ✓         | ✓                                         |    | ✓                                                                                                            | ✓              | ✓              |
| Vital Signs (BP, HR)                                       | ✓         | ✓                                         |    | ✓ <sup>c</sup>                                                                                               | ✓ <sup>c</sup> | ✓ <sup>c</sup> |
| Pregnancy test                                             | ✓         | ✓                                         |    | ✓                                                                                                            | ✓              | ✓              |
| K-SADS                                                     | ✓         |                                           |    |                                                                                                              |                |                |
| WISC-IV/WAIS-IV                                            | ✓         |                                           |    |                                                                                                              |                |                |
| TRF                                                        | ✓         |                                           |    |                                                                                                              |                |                |
| YSR                                                        | ✓         |                                           |    |                                                                                                              |                |                |
| CBCL                                                       | ✓         |                                           |    |                                                                                                              |                |                |
| NCBRF-TIQ                                                  | ✓         |                                           |    |                                                                                                              |                |                |
| MOAS                                                       | ✓         |                                           |    |                                                                                                              |                |                |
| CPRS                                                       | ✓         |                                           |    |                                                                                                              |                |                |
| BRIEF                                                      | ✓         |                                           |    |                                                                                                              |                |                |
| ICU                                                        | ✓         |                                           |    |                                                                                                              |                |                |
| CGI-S                                                      | ✓         |                                           |    |                                                                                                              |                |                |
| C-GAS                                                      | ✓         |                                           |    |                                                                                                              |                |                |

| Visit                                         | -1       | 0a | 0b | 1 | 2 | 3 |
|-----------------------------------------------|----------|----|----|---|---|---|
| Week                                          | -4 to -1 | 0  |    | 1 | 2 | 3 |
| Risk assessment for pharmacological treatment | ✓        | ✓  |    | ✓ |   |   |
| Randomization (Group A/B)                     |          | ✓  |    |   |   |   |
| Randomization (Drug/Placebo sequence)         |          |    |    | ✓ |   |   |
| Drug/placebo administration                   |          |    |    | ✓ | ✓ | ✓ |
| E4 wristband (HR and skin conduct)            |          | ✓  | ✓  | ✓ | ✓ | ✓ |
| Salivar Cortisol level                        |          | ✓  | ✓  | ✓ | ✓ | ✓ |
| IED <sup>d</sup>                              |          | ✓  |    |   |   |   |
| FEERT <sup>e</sup>                            |          | ✓  |    |   |   |   |
| DD <sup>e</sup>                               |          | ✓  |    |   |   |   |
| MJ <sup>e</sup>                               |          | ✓  |    |   |   |   |
| PD <sup>e</sup>                               |          | ✓  |    |   |   |   |
| RVIP <sup>d</sup>                             |          |    | ✓  | ✓ | ✓ | ✓ |
| DMS <sup>d</sup>                              |          |    | ✓  | ✓ | ✓ | ✓ |
| PRT <sup>e</sup>                              |          |    | ✓  | ✓ | ✓ | ✓ |
| NCGT <sup>e</sup>                             |          |    | ✓  | ✓ | ✓ | ✓ |
| FA go no go <sup>e</sup>                      |          |    | ✓  | ✓ | ✓ | ✓ |
| RLT <sup>e</sup>                              |          |    | ✓  | ✓ | ✓ | ✓ |
| ToM <sup>e</sup>                              |          |    | ✓  | ✓ | ✓ | ✓ |
| UG <sup>e</sup>                               |          |    | ✓  | ✓ | ✓ | ✓ |
| Adverse events reporting                      |          |    |    | ✓ | ✓ | ✓ |

a Screening procedures have been performed on two subsequent different days within Week 0

b Only CD/ODD

c Before drug administration and after the end of the testing session

d CANTAB battery

e EMOTICOM battery
